# Supplementary material
Source: PubMed Central journal article supplement (PMC3173082)
Supplement: supp_M111.259028_SUPPLEMENTARY_MATERIAL_v_revised_with_fig_to_send.pdf [file supp_M111.259028_SUPPLEMENTARY_MATERIAL_v_revised_with_fig_to_send.pdf]

## SUPPLEMENTARY MATERIAL

### SYPLEMENTARY FIGURE LEGENDS

**Figure S1.** *Phylogenic studies of the miR-183/96/182 cluster and 3'-UTR of Casp2.* **(A)** Genomic arrangement of the miR-183/96/182 cluster in vertebrates. Numbers under the x-axis represent relative locations on the chromosome in base pairs. The y-axis shows different species. (+) means transcription from centromere to telomere; (-) means transcription from telomere to centromere. **(B)** 3'-UTRs of *Casp2* are highly conserved in mammals. Letters in purple represent the seed regions for miR-183; letters in red indicate the seed regions for miR-96 and miR-182. Letters in the red box denote the conserved region for the miR-183/96/182 cluster.

**Figure S2.** *Creation of the miR-183/96/182 cluster sponge construct.* **(A) a.** Schematic representation of the sponge construct: Ten copies of binding sites for each miR-183/96/182 cluster miR were inserted into the 3'-UTR of EGFP. The construct under control of a mouse opsin promoter ended with a SV40 polyadenylation signal. The whole fragment containing 6.8 kb was cut out by NotI/MluI. The SpongeFor/SpongeRev primer pair was designed for genotyping analysis and the BindingFor/BindingRev primer pair was included to check expression of the sponge element. Binding sequences of miR-183, miR-96 and miR-182 are shown in **b.** **(B)** Testing for the mouse *Opsin* promoter. Only Y79 cells transfected with the sponge construct showed a bright EGFP signal. Phase contrast images are shown on the right. Scale bars: 20  $\mu$ m.

**Figure S3.** *Test of cluster probe specificities.* There were no cross-reactions between different probes.

**Figure S4.** *Creation of miR-183/96/182 stable cell lines.* **(A)** Inserted partial pri-miR sequences of miR-183/96/182 cluster miRs. Letters in purple indicate mature miR sequences; letters in red represent the remaining regions of pre-miR sequences; letters in blue denote cloning and detecting primer sequences. **(B)** Confirmation of miR expression levels in stable cell lines. Note that **a** demonstrates the specific pri-miR expression of target miRs detected by RT-PCR in different stable cell lines, whereas **b** shows specific mature miR expression in different cell lines by splinted ligation.

**Figure S5.** *Creation of target luciferase reporters.* **(A)** Schematic representation of luciferase reporter constructs with four copies of the targeted regions from each target gene's 3'-UTR. The targeted regions in target genes' 3'-UTRs are listed; letters in green represent the seed regions, letters in red denote the complementary nucleotides. **(B)** Testing the linear range of genetically engineered luciferase reporter constructs. From 100-200 ng was found to be in the linear range for all plasmid constructs and the empty pGL3P plasmid whereas 20-50 ng was in the linear range for the *Renilla* plasmid.

**Figure S6.** *Supplementary data for the establishment of miR-183/96/182 sponge transgenic mouse cell lines.* **(A)** A standard curve of sponge element DNA is shown with Ct-values derived from quantitative real-time PCR. The slope (efficiency),  $R^2$  (coefficients) and y-intercept (sensitivity) are listed. A transgene size of 1 kb was estimated as 0.17 picograms of transgene per microgram of mouse genomic DNA. **(B)** Tissue specificity of sponge component expression. The opsin promoter mRNA of sponge component constructs was detected only in retina and not in brain, heart, liver or intestine by semiquantitative RT-PCR. RT-minus [RT (-)] and *Gapdh* reactions were used as negative and positive controls. Amplification cycle numbers are indicated on the right. **(C)** Statistical analysis of mature miRs in different transgenic mouse lines. Error bars represent the standard errors of the means (n=3), \*  $p < 0.05$ . **(D)** Immunoblotting results show that *Opsin*

expression levels were not affected by the exogenous mouse *Opsin* promoter in all three transgenic mouse lines.  $\beta$ -Tubulin was used as the internal control.

**Figure S7.** *Casp2* expression levels in 4-month-old wt mouse retina under different light intensity exposure. Immunoblotting data show that both pro-Casp2 and cleaved-Casp2 were increased after 5,000 and 10,000 lux light intensity exposure for 30 min.  $\beta$ -Tubulin was used as the internal control.

## SUPPLEMENTARY TABLES

**Table S1. Primer Sets for Real Time PCR.<sup>1</sup>**

| <b>Name</b>    | <b>mRNA</b>  | <b>Forward</b>        | <b>Reverse</b>       |
|----------------|--------------|-----------------------|----------------------|
| <i>Neurod4</i> | NM_007501    | AGACCGGGCTCTTATGGAAT  | GAATCTTTCAAGGCGAGCTT |
| <i>Hes1</i>    | NM_008235    | GGCCTCTGAGCACAGAAAGT  | GCCGGGAGCTATCTTTCTTA |
| <i>Dcx</i>     | NM_001110222 | CAGAAGCGATCAAACCTGGAA | GGACCACAAGCAATGAACAC |
| <i>Ncald</i>   | NM_001170866 | TGGGACTGCACACATTGAA   | ACTCCTGGATCTCGTGCTCT |
| <i>Rarg</i>    | NM_001042727 | TCATCTGTGGAGACCGAATG  | CCTTGGGAACATGTAGGGTT |
| <i>Gnai3</i>   | NM_010306    | TTGATGTAGGTGGCCAAAGA  | ATGCATTCCGTTTCATTTCT |
| <i>Clock</i>   | NM_007715    | GGCACCACCAATAATAGGCT  | TGCATTAAGTGCTCGTGACA |
| <i>Bhlhe22</i> | NM_021560    | GGTTTAGTGCGGATGAAGTG  | TTTCGCCTCCAAAGAAGACT |
| <i>Casp2</i>   | NM_007610    | GCACAGGAAATGCAAGAGAA  | CTTGGAGCTGAAGCAGTTTG |
| <i>Bcl2</i>    | NM_009741    | GAGTACCTGAACCGGCATCT  | GAAATCAAACAGAGGTCGCA |
| <i>Arrdc3</i>  | NM_001042591 | TCTGGGAAGACAGAGACGTG  | ATCCACGTACACCATTAGCG |
| Binding        |              | TCCTGCTGGAGTTCGTGAC   | CGTCCCCGGGTTTAAACTA  |
| Pri-miR96      |              | GGGCCATAAACAGAGCAGAG  | GGCAGTGAAAGGTGATCTGG |
| Pri-miR182     |              | TACAGGCCGAAGGACCATAG  | GGCGCAGGGAAACATTAAG  |
| Pri-miR183     |              | CTGGTGAGGAGGGTTGCTAA  | GTAAGGAAACAGGCCCTCTG |
| <i>Gapdh</i>   | NM_008084    | GTGTTCTACCCCAATGTG    | GGAGACAACCTGGTCCTCAG |

<sup>1</sup>Primer sets used in this research. The first column shows the identities of the primer sets; the second column indicates the corresponding accession number; and the third and fourth columns present the sequences of the forward and reverse primers, respectively.

**Table S2. Oligonucleotides used for Splinted Ligation.<sup>1</sup>**

| <b>Name</b>         | <b>Sequence</b>                         |
|---------------------|-----------------------------------------|
| Bridge-mmu-miR-96   | GAATGTCATAAGCGAGCAAAAATGTGCTAGTGCCAAA   |
| Bridge-mmu-miR-182  | GAATGTCATAAGCGCGGTGTGAGTTCTACCATTGCCAAA |
| Bridge-mmu-miR-183  | GAATGTCATAAGCGAGTGAATTCTACCAGTGCCATA    |
| Bridge-mmu-miR-125a | GAATGTCATAAGCGTACAGGTTAAAGGGTCTCAGGGA   |
| Bridge-mmu-Let-7    | GAATGTCATAAGCGAACTATACAACCTACTACCTCA    |
| Bridge-mmu-miR-107  | GAATGTCATAAGCGTGATAGCCCTGTACAATGCTGCT   |
| Mimic-mmu-miR-96    | TTTGCCACTAGCACATTTTTGCT                 |
| Mimic-mmu-miR-182   | TTTGCAATGGTAGAACTCACACCG                |
| Mimic-mmu-miR-183   | TATGGCACTGGTAGAATTCCT                   |

<sup>1</sup>Oligonucleotides used for splinted ligation. Bridge oligonucleotides were used to hybridize the detection probe and target miRs; mimic oligonucleotides simulating the endogenous miR sequences were used as positive controls.

Table S3. Statistical analysis of Figure 3Cb.<sup>1</sup>

|                  | <i>wt</i> |         |         | <i>transgene</i> |          |          |
|------------------|-----------|---------|---------|------------------|----------|----------|
|                  | 0 min     | 10 min  | 30 min  | 0 min            | 10 min   | 30 min   |
| <i>rod Opsin</i> | 1.0±0.1   | 0.9±0.1 | 0.9±0.1 | 1.0±0.1          | 0.7±0.1* | 0.4±0.0* |
| <i>Mw-opsin</i>  | 1.0±0.1   | 0.9±0.1 | 0.8±0.1 | 1.0±0.1          | 0.8±0.1  | 0.7±0.1* |

<sup>1</sup>Immunoblotting data were quantified by Image J. Both *Opsin* and *Mw-opsin* levels were normalized by *Tubulin*. Data represent means±S.D. (n=3), \*  $p < 0.05$ .

**Table S4. Statistical analysis of Figure 5Cb.<sup>1</sup>**

|                      | <b>NIH3T3</b> | <b>miR-96</b> | <b>miR-182</b> | <b>miR-183</b> |
|----------------------|---------------|---------------|----------------|----------------|
| <b>pro-Casp2</b>     | 1.0±0.0       | 0.4±0.1*      | 0.5±0.1*       | 1.1±0.1        |
| <b>cleaved-Casp2</b> | 1.0±0.0       | 0.6±0.2*      | 0.5±0.2*       | 1.0±0.2        |

<sup>1</sup>Immunoblotting data were quantified by Image J. Both pro-Casp2 and cleaved-Casp2 levels were normalized by *Tubulin*. Data represent mean±S.D. (n=3), \*  $p < 0.05$ .

**Table S5. Statistical analysis of Figure 6Ab.<sup>1</sup>**

|                | <b>0 h</b> | <b>1 h</b> | <b>3 h</b> | <b>6 h</b> | <b>12 h</b> | <b>24 h</b> | <b>72 h</b> |
|----------------|------------|------------|------------|------------|-------------|-------------|-------------|
| <b>miR-96</b>  | 1.0±0.0    | 0.9±0.3    | 1.2±0.2    | 1.5±0.3    | 1.7±0.2*    | 2.5±0.4*    | 1.1±0.2     |
| <b>miR-182</b> | 1.0±0.0    | 1.0±0.2    | 1.1±0.2    | 1.3±0.2    | 1.2±0.4     | 1.3±0.4     | 1.1±0.1     |
| <b>miR-183</b> | 1.0±0.0    | 1.2±0.1    | 1.3±0.2    | 1.6±0.2    | 1.6±0.1*    | 2.1±0.1*    | 1.0±0.0     |

<sup>1</sup>Splinted ligation data were quantified by Image J. miR-96, miR-182 and miR-183 levels were normalized by Let-7. Data represent means±S.D. (n=3), \*  $p<0.05$ .

**Table S6. Statistical analysis of Figure 6Bb.<sup>1</sup>**

|                      | <i>wt</i>   |               | <i>transgene</i> |               |
|----------------------|-------------|---------------|------------------|---------------|
|                      | not treated | light-induced | not treated      | light-induced |
| <b>pro-Casp2</b>     | 1.0±0.0     | 1.2±0.2       | 1.0±0.4          | 1.3±0.4       |
| <b>cleaved-Casp2</b> | 1.0±0.0     | 1.4±0.4       | 1.1±0.4          | 3.0±0.3*      |
| <b><i>Bid</i></b>    | 1.0±0.0     | 1.0±0.2       | 1.0±0.4          | 0.9±0.3       |
| <b><i>tBid</i></b>   | 1.0±0.0     | 1.8±0.5*      | 1.6±0.2*         | 3.3±0.2*      |

<sup>1</sup>Immunoblotting data were quantified by Image J. All protein levels were normalized by *Tubulin*. Data represent means±S.D. (n=3), \*  $p < 0.05$ .



**Table S7. Statistical analysis of Figure S7.<sup>1</sup>**

|                      | <b>0 lux</b> | <b>500 lux</b> | <b>1,000 lux</b> | <b>2,500 lux</b> | <b>5,000 lux</b> | <b>10,000 lux</b> |
|----------------------|--------------|----------------|------------------|------------------|------------------|-------------------|
| <b>pro-Casp2</b>     | 1.0±0.2      | 1.2±0.3        | 1.3±0.3          | 1.2±0.3          | 1.8±0.3*         | 1.6±0.4           |
| <b>cleaved-Casp2</b> | 1.0±0.2      | 1.1±0.2        | 1.5±0.3          | 1.4±0.2          | 2.4±0.3*         | 2.0±0.3*          |

<sup>1</sup>Immunoblotting data were quantified by Image J. Both pro-Casp2 and cleaved-Casp2 levels were normalized by *Tubulin*. Data represent means±S.D. (n=3), \*  $p < 0.05$ .

# A

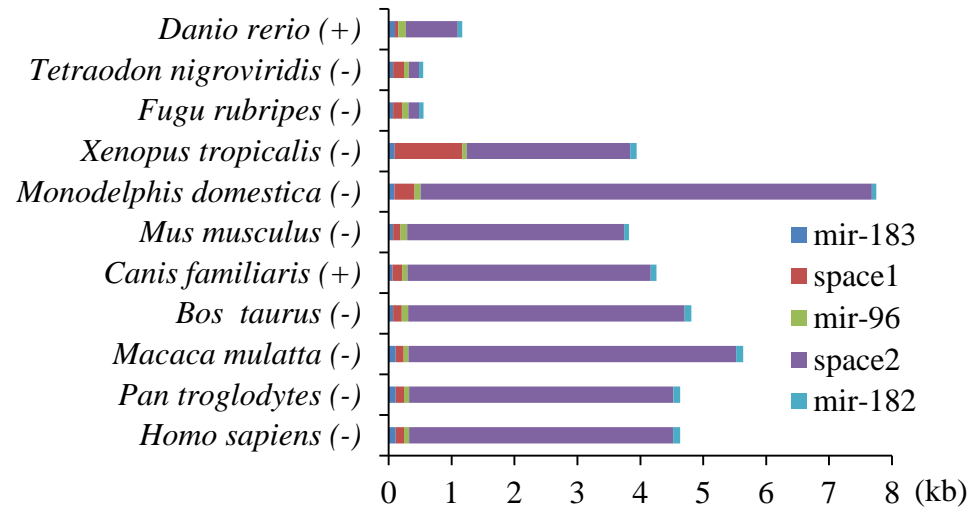

# B

```
Homo_sapiens      AGAGAACCTTTCCACT-CCCCTGCCAGGATTTTGTATTGCCATCGGGTGCCAAAATAAAT
Pan_troglodytes  AGAGAACCTTTCCACT-CCCCTGCCAGGATTTTGTATTGCCATCGGGTGCCAAAATAAAT
Pongo_pygmaeus   CGAGAATCTTTCCACT-CCCCTGCCAGGATTTTGTATTGCCATCAGGTGCCAAAATAAAT
Rattus_norvegicu GTAGACTCTTCACACTTCCCACTGCCAAGATTTTGTATTGCCATCAGGTGCCAAAATAAAT
Mus_musculus     GTAGAATCTTCACACTTCCCACTGCCAAGATTTTGTATTGCCATCAGGTGCCAAAATAAAT
Monodelphis_dome TGAGCCTCTCCCCACTCCCCACTGCCAGGGTTTGTATTGTTTTCAGGTGCCAAAATAAAT
Bos_taurus       ATAGAACCTTTCCAGTTCCCCTGCCAGGATTTTGTATTGCCATCTGGTGCCAAAATAAAT
Canis_familiaris ATAGAACCTTTCCACTTCCCCTGCCAGGATTTTACATTGCCTTCAGGTGCCAAAATAAAT
Equus_caballus   ATAGAACCTTTCCACTTCCCCTGCCAGGATTTTGTATTGCCATCAGGTGCCAAAATAAAT
**      **      ** * ***** * ***** ** *****
```

Figure S1

**A**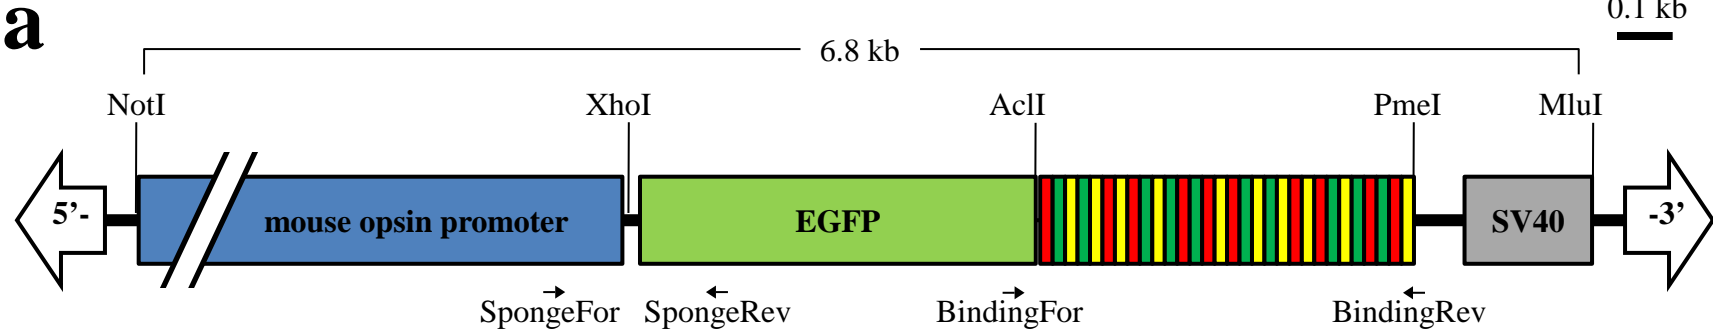**b**

**miR-183 binding sequence:**

UTR 5'-AGTGAATTCT AGTGCCATA  
 miR UCACUUAAGA UCACGGUAU-5'

TGG  
UGG

**miR-96 binding sequence:**

UTR 5'-AGCAAAAATG AGTGCCAAA  
 miR UCGUUUUUAC UCACGGUUU-5'

ACG  
ACGA

**miR-182 binding sequence:**

UTR 5'-CGGTGTGAGTT ATTGCCAAA  
 miR GCCACACUCAA UAACGGUUU-5'

GAGG  
GAUGG

**B**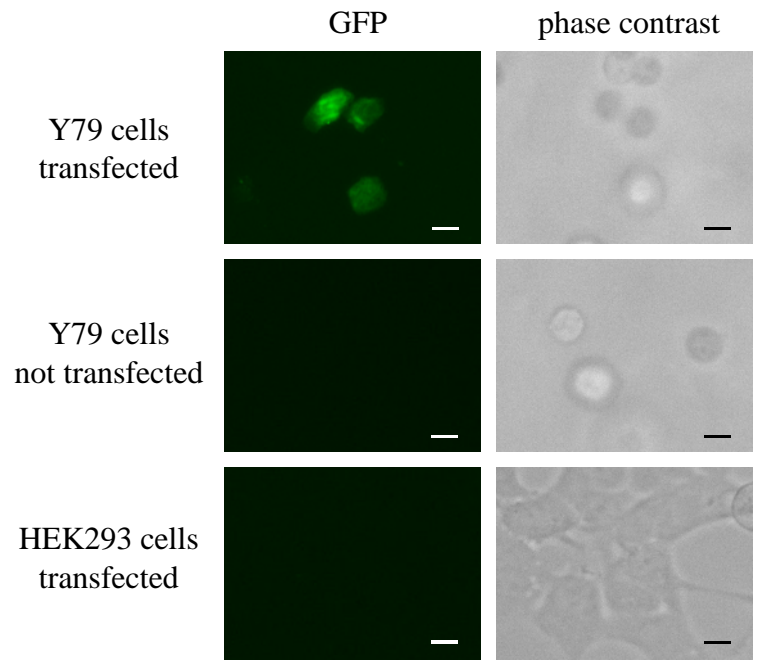**Figure S2**

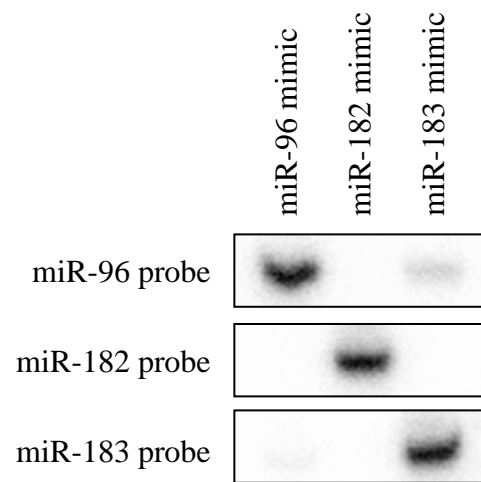

**Figure S3**

# A

## Mmu-miR-96 pri-miR

GGGCCATAAACAGAGCAGAGACAGATCCGGGAGCACCTTGGAGCTCCTCACCCCTTCTGCCTAGACCTCTGTTTTCCAGGGGTGCCAGGGTACAAAGACCTCCTCTGCCTTTCCCCAGAGGGCCTGTTCCAGTACCATCTGCTTGCCCGATTTTGGCACTAGCACATTTTGGCTTGTGTCTCTCCGCTGTGAGCAATCATGTGTAGTGCCAATATGGGA  
AAAGCGGGCTGCTGCGGCCACGTTACCTCCCCGGCATCCAGGGTCTGTGTCTCACTGGCTCCCTGGCCCATCTGGCTTACTGCTGGGTGAGGAGGGTACAGCCT  
ACCCTGGTGAACAGCCAGATCACCTTCACTGCC

## Mmu-miR-182 pri-miR

TACAGGCCGAAGGACCATAGTCTGGACCTTGTGTTAACTGTGGGAAGAGCGCCCTCCTAAAACCACCCTAACTGCTTCTTTCAGCATAGGCTTACTGGTCTGGCTGCT  
GGAGGCCTCCCACCATTTTGGCAATGGTAGAACTCACACCCGTAAGGTAATGGGACCCGGTGGTCTAGACTTGCCAACTATGGTGTAAAGTGTGAGCTGCTGAAGGT  
CTGCACCGTGCCGGAACCTGCCGATCACCAGGAAGGAGAGGGGACTCTGTCTCCAGACCACAGGCAGTGGCAGAGGGTGGGCGCAGCTGGAAGTGACCCTTAATGT  
TTCCTGCGCC

## Mmu-miR-183 pri-miR

CTGGTGAGGAGGGTGTCTAACTGCGGATGACAGCAGTGGGGTGGGGTGGGGGAGTAGGTTGTAGGACCTCCAGGAGAAGGCAGCTGACCCCTTGCAGGGTCTGC  
AGGCTGGAGAGTGTGACTCCTGTCTCTGTGTATGGCACTGGTAGAATTCACCTGTGAACAGTCTCAGTCAGTGAATTACCGAAGGGCCATAAACAGAGCAGAGACAGATCC  
CGCAGCACCTTGGAGCTCTCACCCCTTCTGCCTAGACCTCTGTTTTCCAGGGGTGCCAGGGTACAAAGACCTCCTCTGCTCCTTCCCAGAGGGCCTGTCCAGTAC

# B

## a

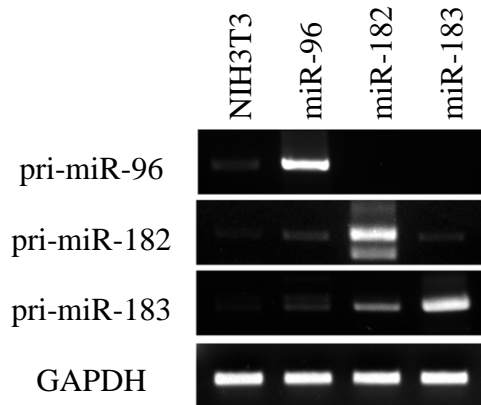

## b

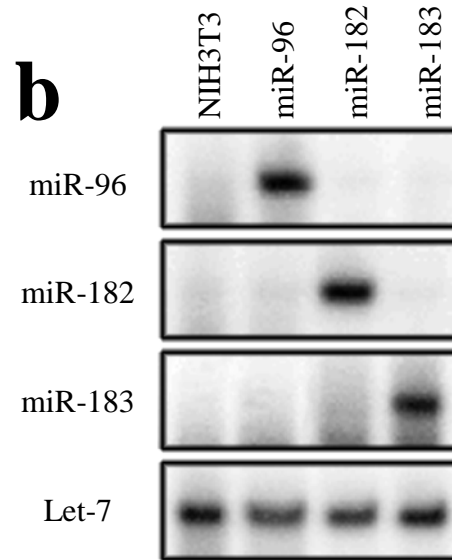

Figure S4

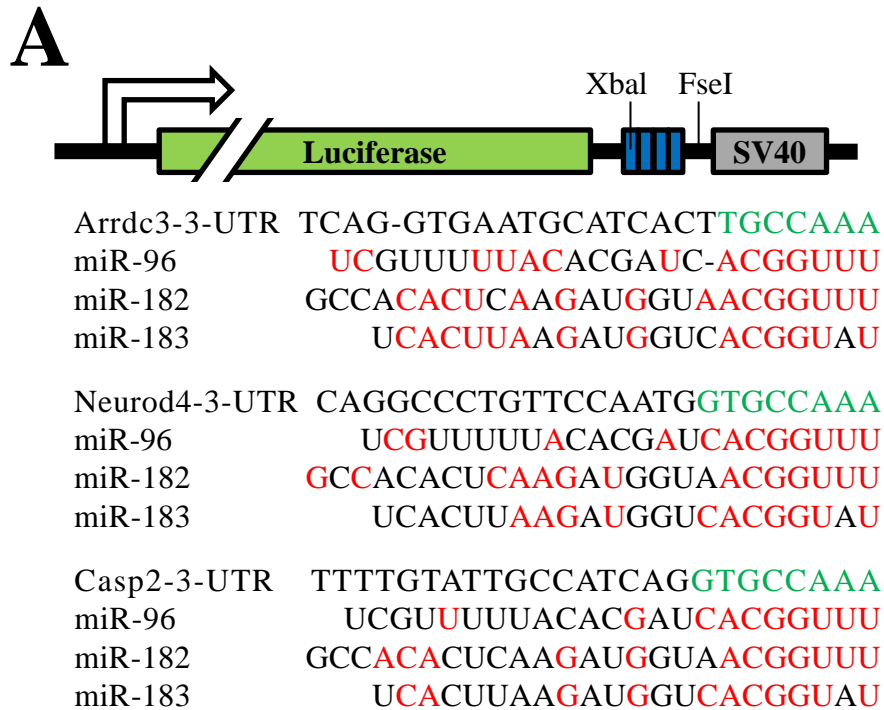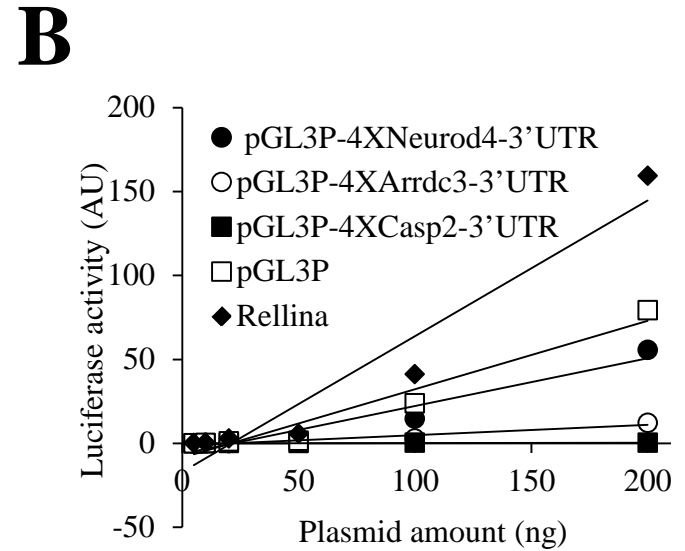

**Figure S5**

**A****Standard Curve**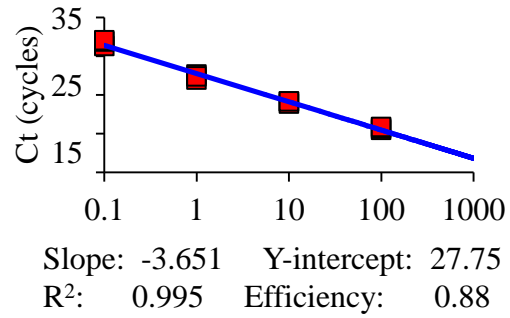**B**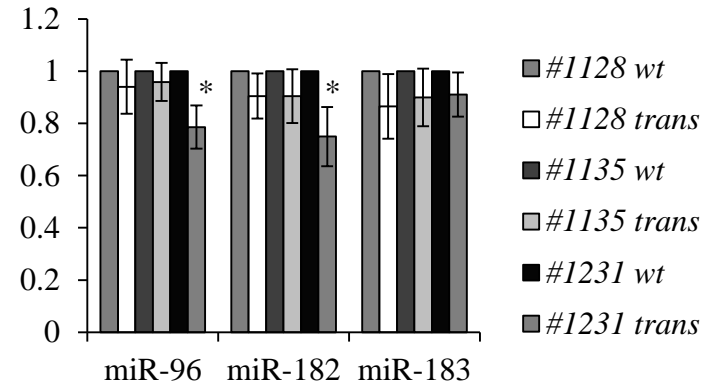**C**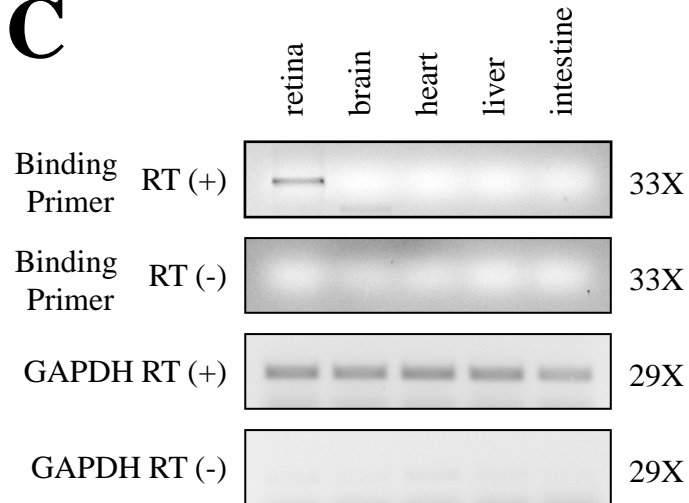**D**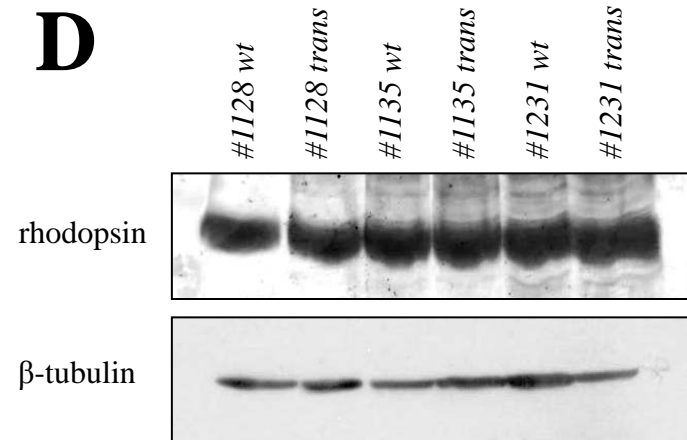**Figure S6**

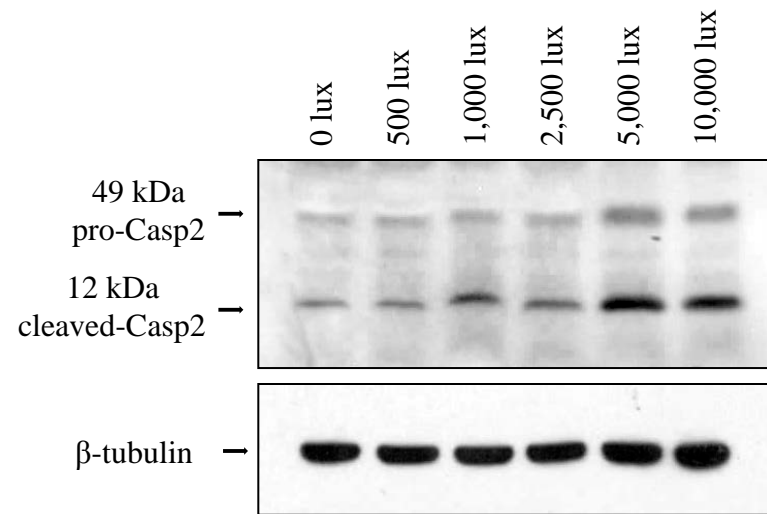

**Figure S7**
